# Supplementary material for: Sluggish Li 2 O 2 dissolution – a key to unlock high-capacity lithium–oxygen batteries
Source: Royal Society of Chemistry journal article supplement (doi:10.1039/d4sc05911e), 2024-12-02
Supplement: d4sc05911e1.pdf [file d4sc05911e1.pdf]

## Supplementary Information

### Experimental details

#### **Materials and chemicals:**

Lithium bis((trifluoromethyl)sulfonyl)azanide (LiTFSI) were purchased from Sigma-Aldrich. Tetraethylene glycol dimethyl ether (TEGDME) and dimethyl sulfoxide (DMSO) were purchased from Macklin. Super P carbon (SP) and polytetrafluoroethylene (PTFE) was purchased from Dodochem. The quartz crystal electrode was purchased from CH Instruments. Its thickness is 0.21 mm, its area is 0.22 cm<sup>2</sup>, and its resonant frequency is 7.995 MHz. Before use, LiTFSI was vacuum-dried at 120°C for 24 hours, and TEGDME and DMSO were dehydrated using 4 Å molecular sieves. All materials were stored in an argon-filled glove box with a moisture content of less than 0.1 ppm. No further purification of the materials was performed before use. The electrolyte used in this study is 1 M LiTFSI in TEGDME/DMSO.

#### **Characterization:**

The morphology of the products was observed using a scanning electron microscope (SEM, JEOL S-4800). The types of discharge products were characterized using Raman spectroscopy (Raman, Horiba XploRA Plus). The yield of Li<sub>2</sub>O<sub>2</sub> was quantified using ultraviolet-visible spectroscopy (UV-vis, SDPTOP-756PC). The vibrating frequency of the crystal electrode was in situ recorded using the quartz crystal microbalance (QCM) function of an electrochemical workstation (CHI 440)<sup>1,2</sup>.

#### **Electrochemical testing:**

The electrochemical deposition-dissolution experiments were conducted using a custom-made QCM mold, as shown in Figure 1a. During the electrochemical testing, the QCM functionality was used simultaneously. Perform cyclic voltammetry (CV) on the crystal electrode in a 10 mM AgNO<sub>3</sub> and 0.1 M KNO<sub>3</sub> aqueous solution with a scan rate of 10 mV s<sup>-1</sup>. Simultaneously use the QCM functionality of the electrochemical workstation to establish the relationship between the vibration frequency and mass of the crystal electrode.

Li<sub>2</sub>O<sub>2</sub> deposition experiments: The deposition of Li<sub>2</sub>O<sub>2</sub> on the crystal electrode was achieved by performing linear sweep voltammetry (LSV) in the O<sub>2</sub>-saturated electrolyte with a scan rate of 2 mV s<sup>-1</sup>. The electrolyte used was 1 M LiTFSI in TEGDME. For experiments at different angles, the electrode was positioned at 0°, 45°, 90°, and 135° in the electrolyte. A custom-made QCM mold enabled testing at these different angles. The working electrode, reference electrode, and counter electrode were quartz crystal electrode (Au), Ag/AgCl electrode, and Li foil, respectively. The effects of different electrode materials were studied by replacing the working electrode with Pt or C crystal electrodes.

Li<sub>2</sub>O<sub>2</sub> dissolution experiments: To measure the dissolution rate of Li<sub>2</sub>O<sub>2</sub>, we removed the discharge current after the deposition process and recorded the mass change of the electrode surface using QCM functionality. When measuring the intrinsic dissolution rate of Li<sub>2</sub>O<sub>2</sub>, we applied a small reduction current (2 nA, eq. 9 nA cm<sup>-2</sup>, two orders of magnitude smaller than the actual discharge current) to maintain the discharge state of the electrode surface and the adsorption state of the Li<sub>2</sub>O<sub>2</sub>, while recording the mass change of the electrode surface. A tiny discharge current of 2 nA is equivalent to Li<sub>2</sub>O<sub>2</sub> depositing rate of 0.12 ng cm<sup>-2</sup> min<sup>-1</sup>, two orders of magnitude smaller than the dissolving rate. To study the effect of the solvent on the dissolution process, we replaced the electrolyte with 1 M LiTFSI in DMSO and used the same testing method.

The discharge experiments with vertical and upward electrodes were conducted in the same O<sub>2</sub>-saturated electrolyte. The electrolyte was 1 M LiTFSI in TEGDME. The working electrode, reference electrode, and counter

electrode were Au plate electrode (at 0° and 90°), Ag/AgCl electrode, and Li foil, respectively. The testing conditions involved constant current discharge at a current density of 1.5 and 3  $\mu\text{A cm}^{-2}$ .

The intermittent discharge experiments were conducted in a lithium-oxygen mold cell. The positive electrode was a porous electrode exposed to  $\text{O}_2$ . The porous electrode was made by uniformly mixing SP and PTFE in a 4:1 ratio and coating it onto carbon paper. The active material loading was approximately 3  $\text{mg cm}^{-2}$ . The negative electrode was Li. The electrolyte was 1 M LiTFSI in TEGDME. The Glass Fiber GF/F was used as separator. The intermittent discharge involved discharging the cell at a constant current density of 0.22  $\text{mA cm}^{-2}$  for 10 minutes, then stopping, and holding the cell voltage at 2.9 V for 3 minutes before repeating the cycle. The control group involved continuous discharge of the cell at a constant current density of 0.22  $\text{mA cm}^{-2}$  until the cut-off voltage was reached.

Calculation of the  $\text{Li}_2\text{O}_2$  thickness on Au-90°:

$$H = \frac{m}{S \cdot \rho}$$

In this context, H represents the thickness of  $\text{Li}_2\text{O}_2$  (cm), m denotes the mass of  $\text{Li}_2\text{O}_2$  (g),  $\rho$  signifies the density of  $\text{Li}_2\text{O}_2$  ( $\text{g cm}^{-3}$ ), and S indicates the electrode area ( $\text{cm}^2$ ). The calculations in the text use a density of 1.2  $\text{g cm}^{-3}$  and an electrode area of 0.22  $\text{cm}^2$ .

#### **Calculation of the $\text{Li}_2\text{O}_2$ yield:**

The yield of  $\text{Li}_2\text{O}_2$  is quantified using UV-Vis spectroscopy. The  $\text{Li}_2\text{O}_2$  forms a pale yellow complex  $[\text{Ti}(\text{O}_2)]^{2+}$  in the titration solution (2%  $\text{TiOSO}_4$  dissolved in 1 M  $\text{H}_2\text{SO}_4$ ). This complex has an absorption peak at  $\lambda_{\text{max}} = 405 \text{ nm}$ . The intensity of this absorption peak can be used to calculate the content of  $\text{Li}_2\text{O}_2$ . By directly adding a known quantity of  $\text{Li}_2\text{O}_2$  to the titration solution, an absorbance of A=1 is obtained at  $\lambda_{\text{max}} = 405 \text{ nm}$  for a discharge amount of 0.225 mAh. Therefore, with a known discharge capacity, the yield of  $\text{Li}_2\text{O}_2$  can be determined by diluting the  $\text{Li}_2\text{O}_2$  on the electrode to the same extent and measuring the absorbance at  $\lambda_{\text{max}} = 405 \text{ nm}$ . A trace amount of  $\text{Li}_2\text{O}_2$  was titrated using N, N-diethyl-1,4-phenylenediamine (DPD). The samples were placed in tubes containing 0.4 mL buffer solution, 3 mL  $\text{H}_2\text{O}$ , 0.05 mL DPD, and 0.05 mL hydrogen peroxidase, and the resulting solution was tested by UV-Vis spectroscopy. The buffer solution was prepared by mixing 1 M potassium dihydrogen phosphate and 1 M dipotassium phosphate in a volume ratio of 7:1. The yield of  $\text{Li}_2\text{CO}_3$  was quantified using DEMS. An excess of phosphoric acid was added to the sample, and the  $\text{CO}_2$  produced during the reaction was detected by DEMS.

#### **Estimating the Charging Current:**

$$\text{Charging Current} = \frac{\text{actual dissolution rate} \times F}{M_{\text{Li}_2\text{O}_2}}$$

actual dissolution rate = measured dissolution rate  $\times$  effective exposure area

$$\text{effective exposure area} = \frac{Q \times M_{\text{Li}_2\text{O}_2}}{F} \times S_{\text{Li}_2\text{O}_2\text{-torus}} \times \text{effective coefficient}$$

$$m_{\text{Li}_2\text{O}_2\text{-torus}} = \rho_{\text{Li}_2\text{O}_2} \times V_{\text{Li}_2\text{O}_2\text{-torus}}$$

$$V_{\text{Li}_2\text{O}_2\text{-torus}} = \frac{1}{4} \pi^2 r_{\text{Li}_2\text{O}_2}^3$$

## Supplementary Figures

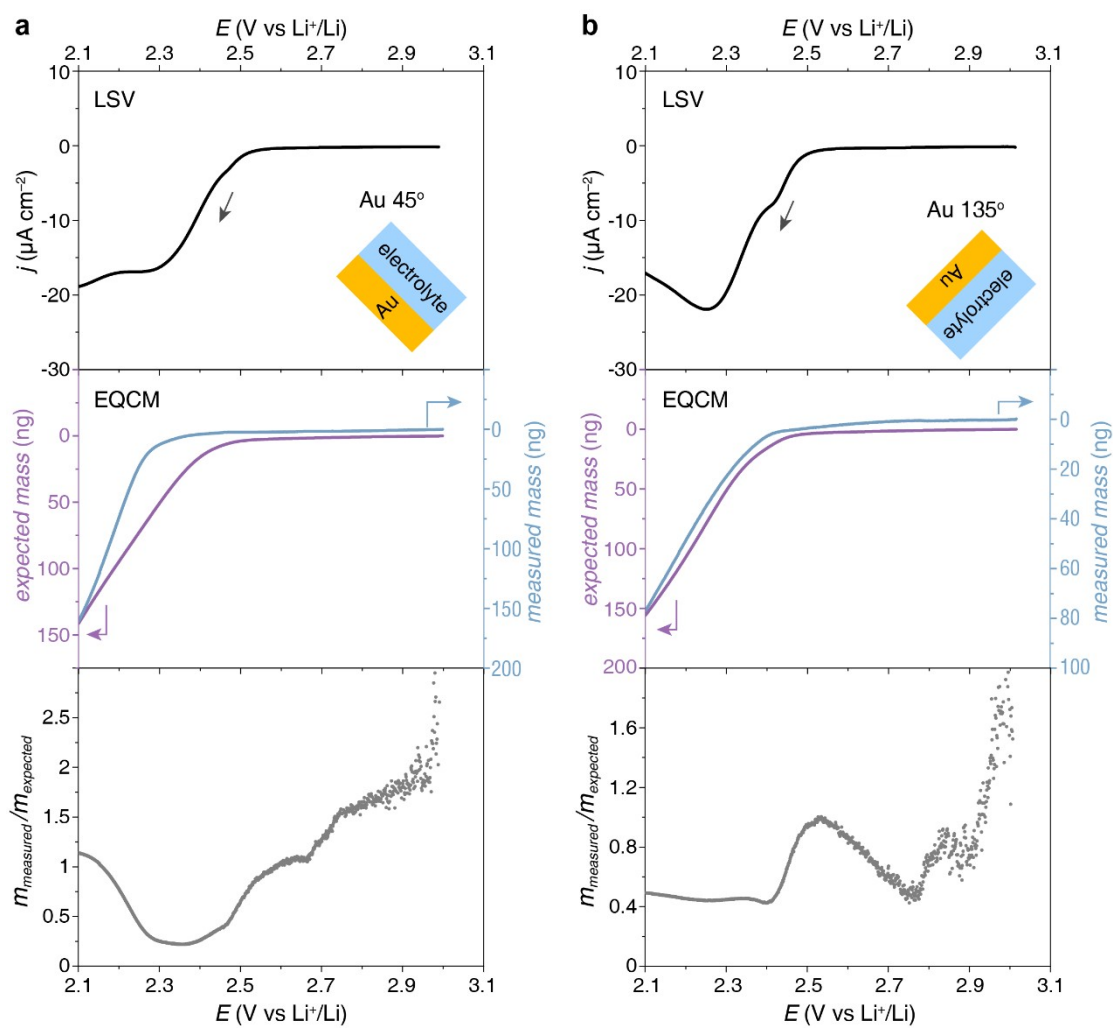

**Figure S1.** The deposition results on the Au crystal electrode at 45° and 135°.

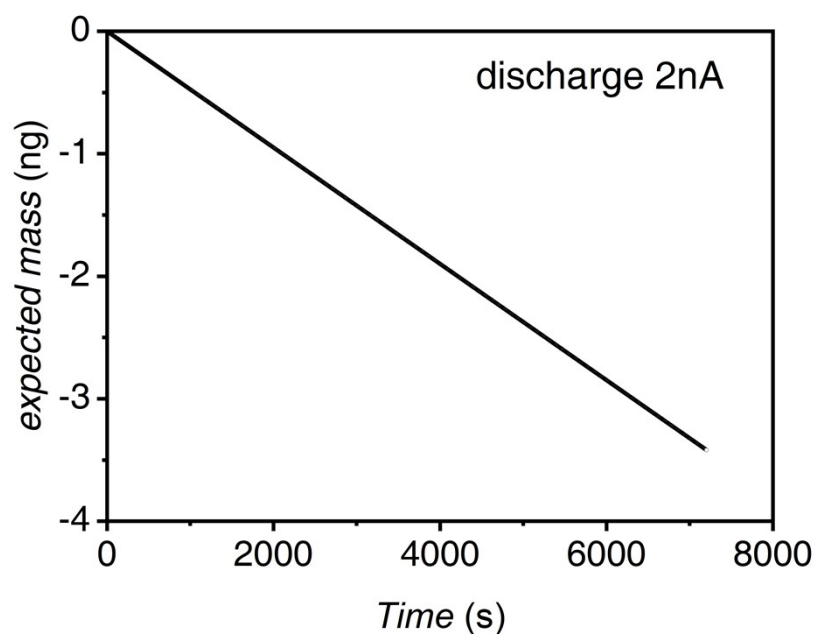

**Figure S2.** The product deposition rate corresponding to the 2 nA reduction current is  $0.12 \text{ ng cm}^{-2} \text{ min}^{-1}$ . The amount of  $\text{Li}_2\text{O}_2$  generated in this electrochemical process is much lower than the amount of  $\text{Li}_2\text{O}_2$  dissolved from the electrode surface, so it can be neglected.

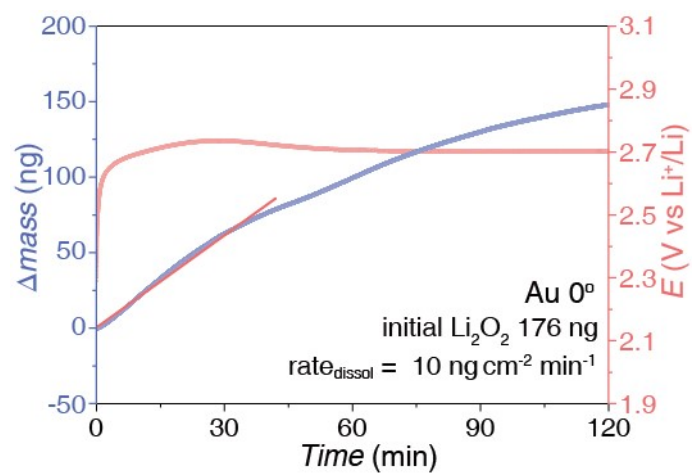

**Figure S3.** The dissolution rate of products on the electrode (Au-0°) with 2 nA reduction current applied, when the initial Li<sub>2</sub>O<sub>2</sub> amount was 176 ng. It demonstrates that the initial amount of products on the electrode surface does not affect the dissolution rate.

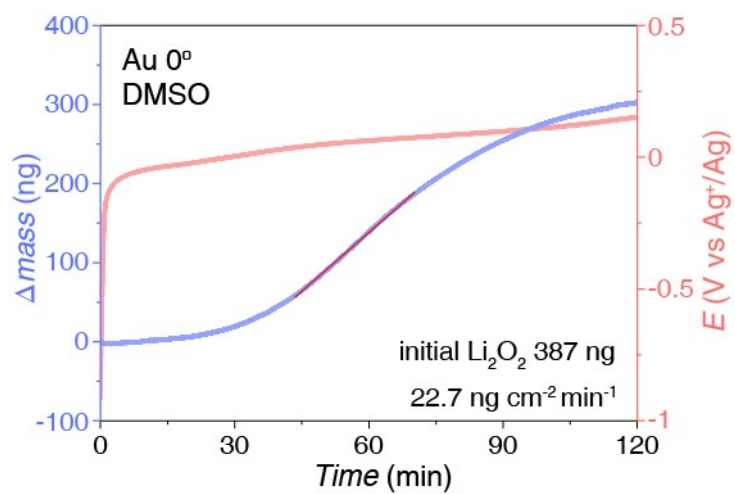

**Figure S4.** The dissolution rate of products on the Au electrode (Au-0°) surface in DMSO-based electrolyte. The initial Li<sub>2</sub>O<sub>2</sub> amount was 387 ng.

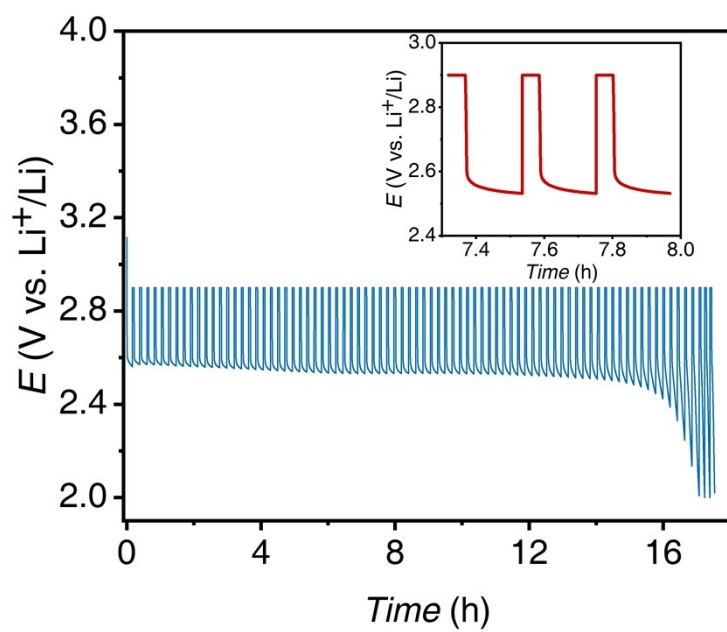

**Figure S5.** Discharge curves of intermittent-desorption discharge lithium-oxygen battery. Current density:  $0.22 \text{ mA cm}^{-2}$ .



## References

1. Y. Ji, Z.-W. Yin, Z. Yang, Y.-P. Deng, H. Chen, C. Lin, L. Yang, K. Yang, M. Zhang, Q. Xiao, J.-T. Li, Z. Chen, S.-G. Sun and F. Pan, *Chem. Soc. Rev.*, 2021, **50**, 10743-10763.
2. G. Vanhoutte, S. Schaltin, M. Wu, F. Bardé and J. Fransaer, *ECS Meeting Abstracts*, 2015, **MA2015-03**, 454.
3. Y. J. Lee, W.-J. Kwak, Y.-K. Sun and Y. J. Lee, *ACS Appl. Mater. Interfaces*, 2018, **10**, 526-533.
